# Supplementary material for: How do the hydrocarbon chain length and hydroxyl group position influence the solute dynamics in alcohol-based deep eutectic solvents?
Source: Royal Society of Chemistry journal article supplement (doi:10.1039/c8cp04859b), 2018-01-01
Supplement: c8cp04859b1.pdf [file c8cp04859b1.pdf]

**Supplementary Information**

**How Do the Hydrocarbon Chain Length and Hydroxyl Group Position  
Influence the Solute Dynamics in Alcohol-Based Deep Eutectic Solvents?**

**Sk Saddam Hossain and Anunay Samanta\***

*School of Chemistry, University of Hyderabad, Hyderabad-500 046, India*

*E-mail of corresponding author: [anunay@uohyd.ac.in](mailto:anunay@uohyd.ac.in)*

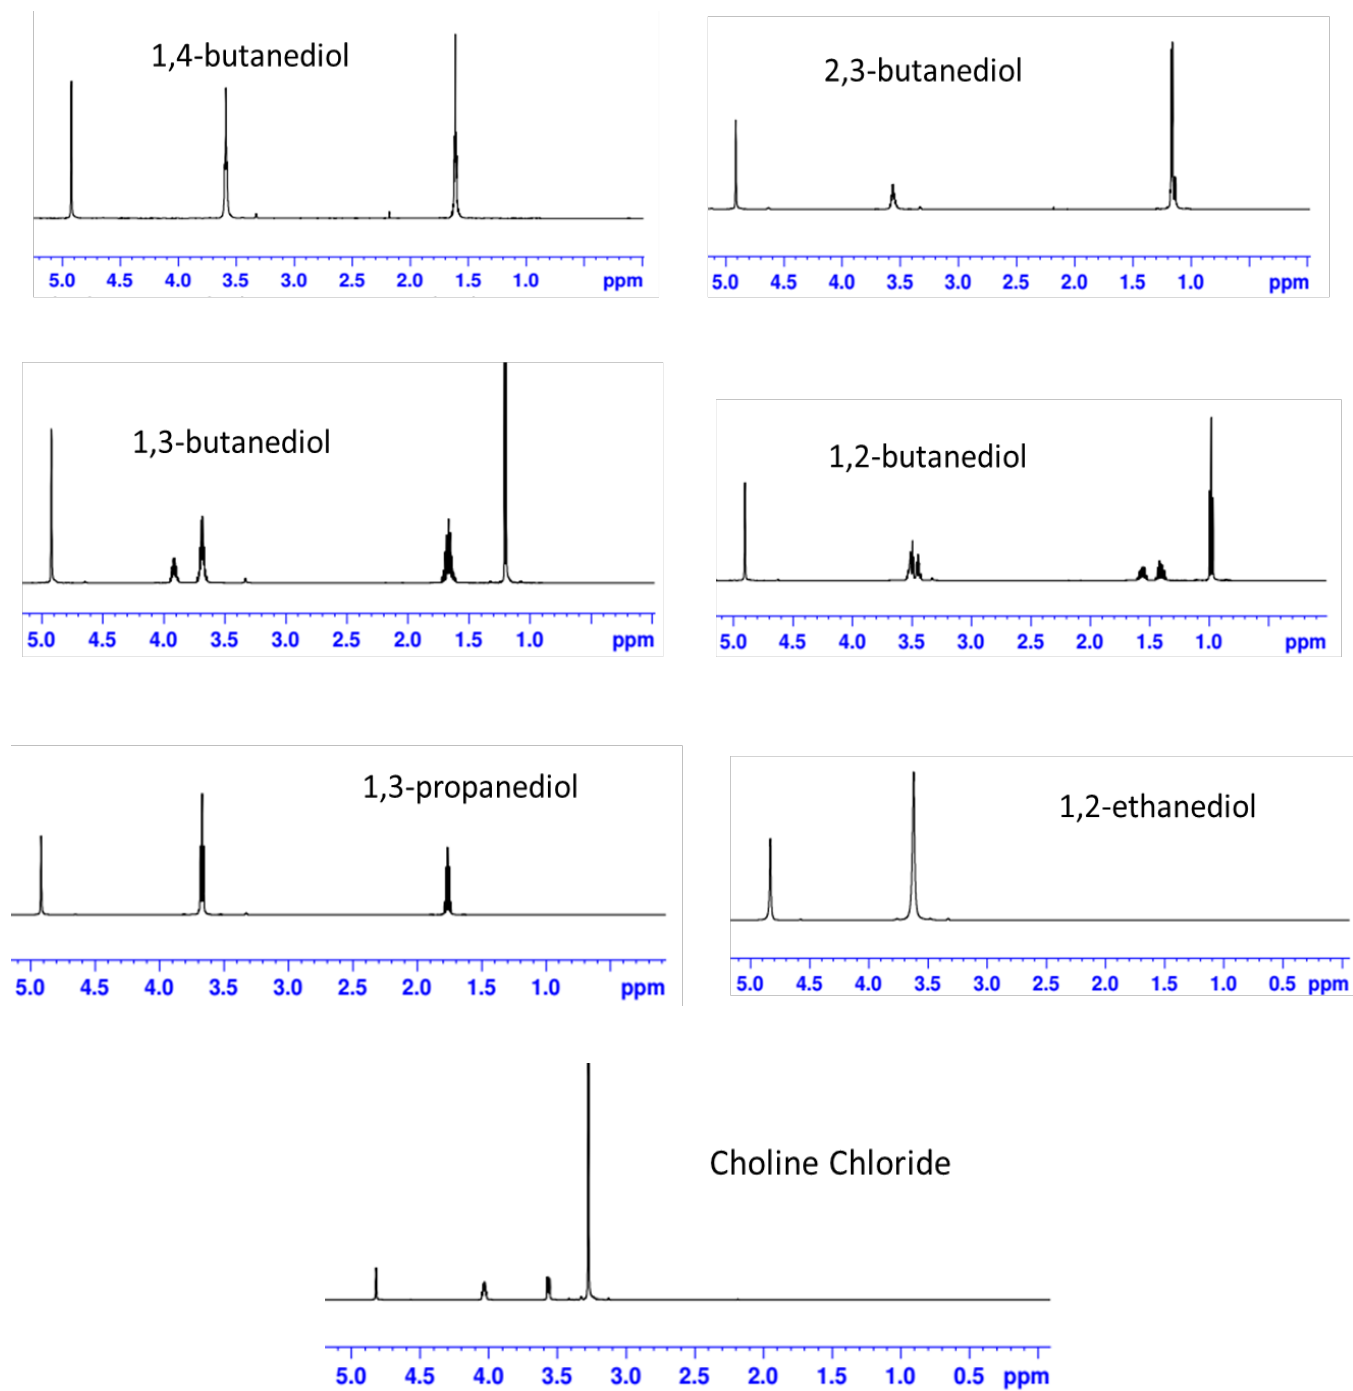

Figure S1.  $^1\text{H}$  NMR spectra of different reagents (in  $\text{CD}_3\text{OD}$ ) used for synthesis of DESs.

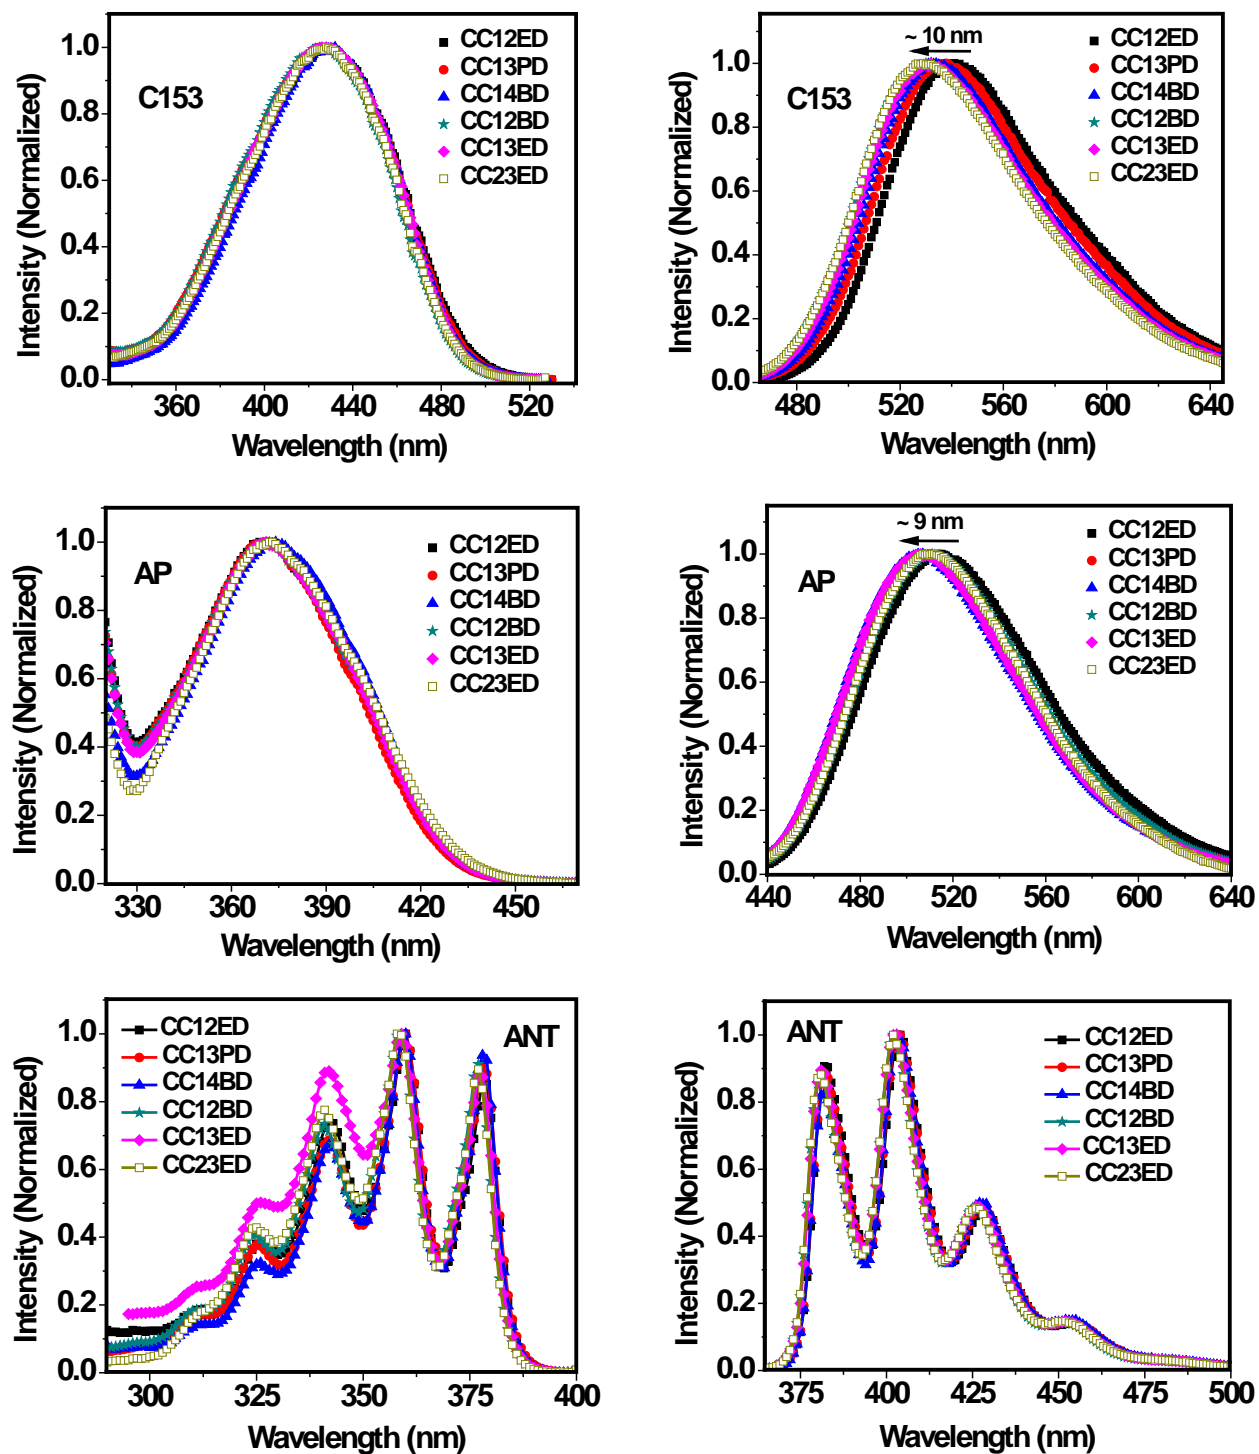

Figure S2. Normalized excitation (left panel) and emission (right panel) spectra of the solutes in six DESs at 298K. The emission/excitation spectra are recorded by exciting the samples at their respective maxima of excitation/emission spectra.

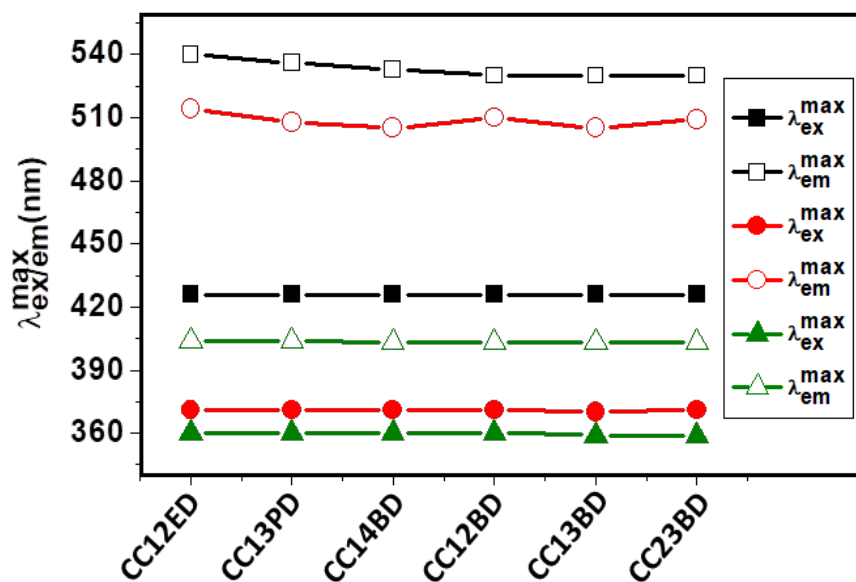

Figure S3. Comparison of the changes of  $\lambda_{ex}^{max}$  and  $\lambda_{em}^{max}$  of C153 (square), AP (circle) and ANT(triangle) in six DESs at 298K.

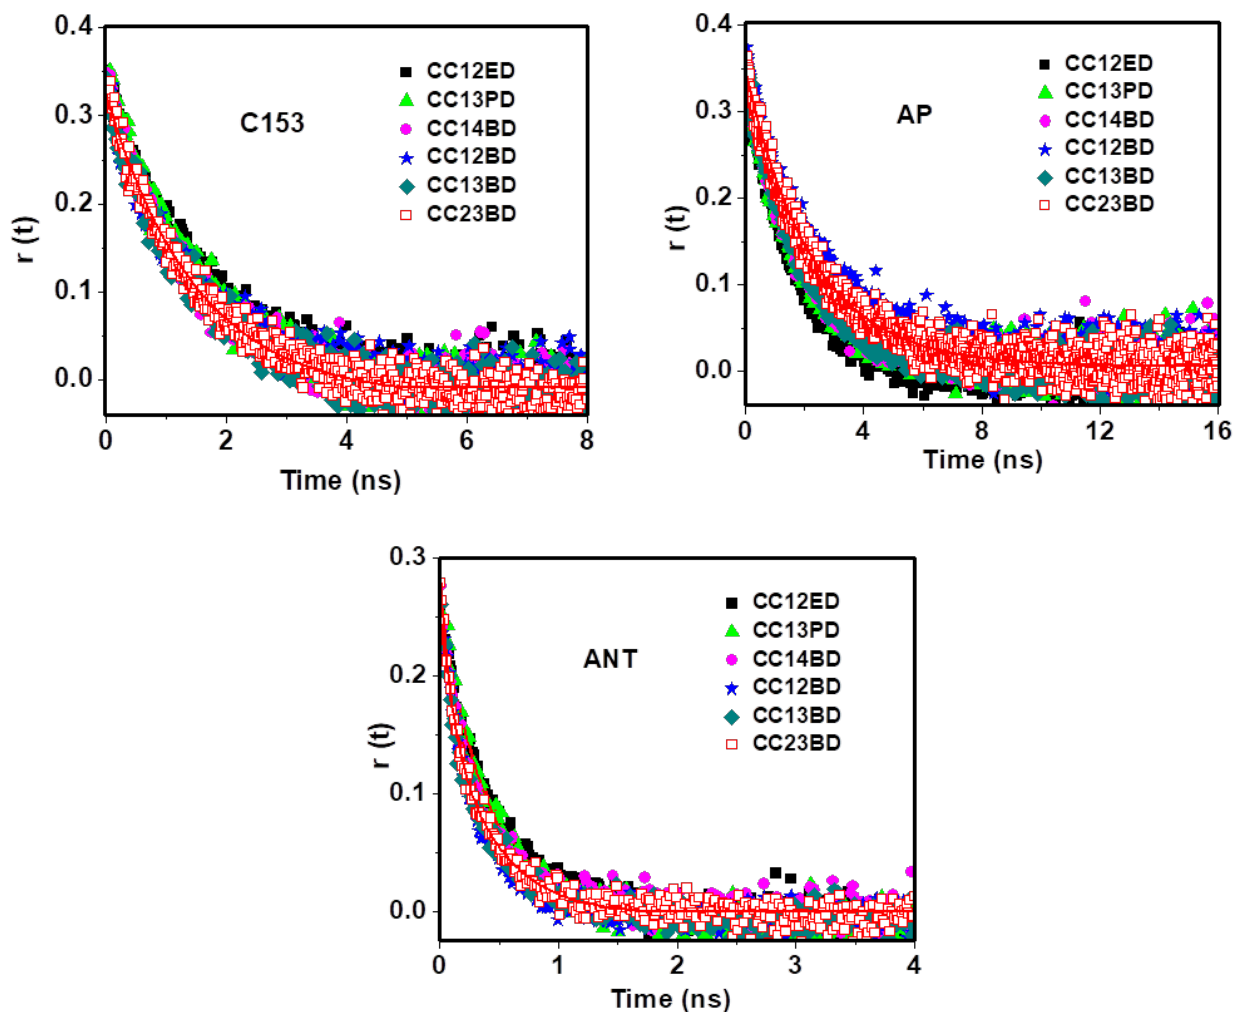

**Figure S4.** Anisotropy decay profiles of the solutes in six DESs at isoviscous (30 cP) condition. The solid lines represent single-exponential fit to the decay profiles. The excitation wavelength for C153/AP and ANT are 405 and 375 nm, respectively. All the decay profiles are recorded by monitoring at respective emission maxima of solutes in six DESs.

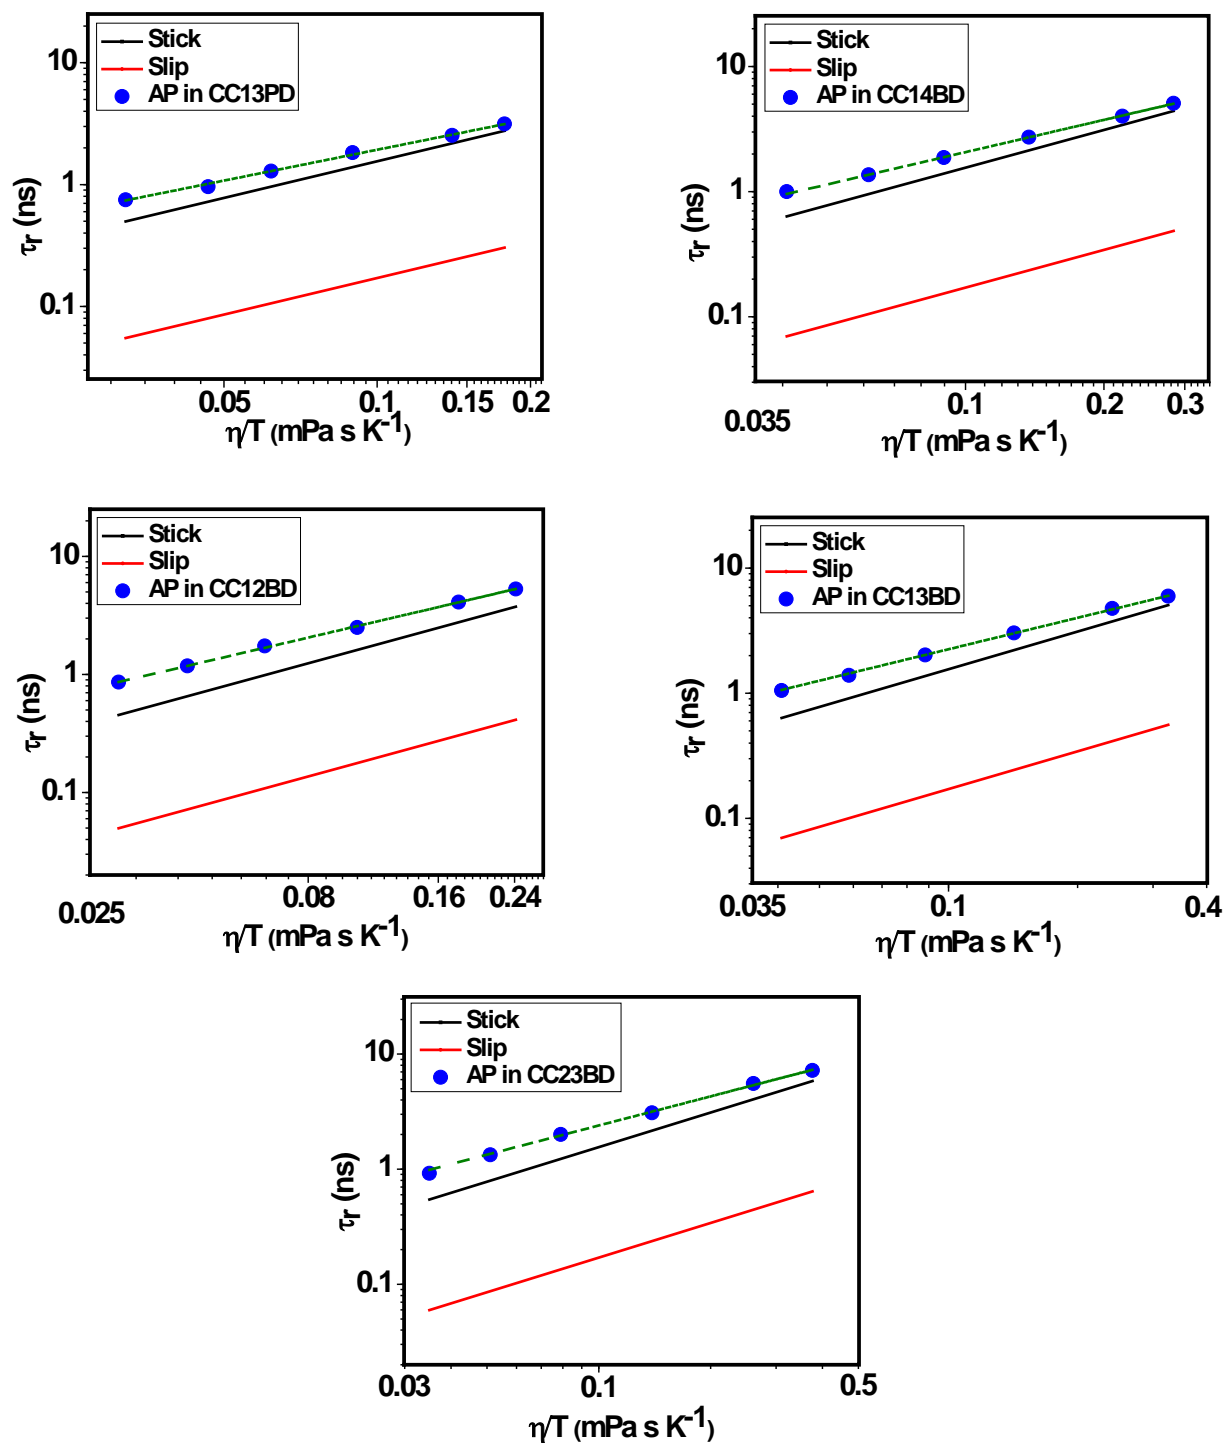

Figure S5. Plots of  $\tau_r$  vs  $\eta/T$  for AP in DESs. The solid circles indicate the experimental rotational times and the dashed lines represent fit to the data according to  $\tau_r = A(\eta/T)^p$ . Computed stick (black) and slip (red) lines using SED theory are also shown.

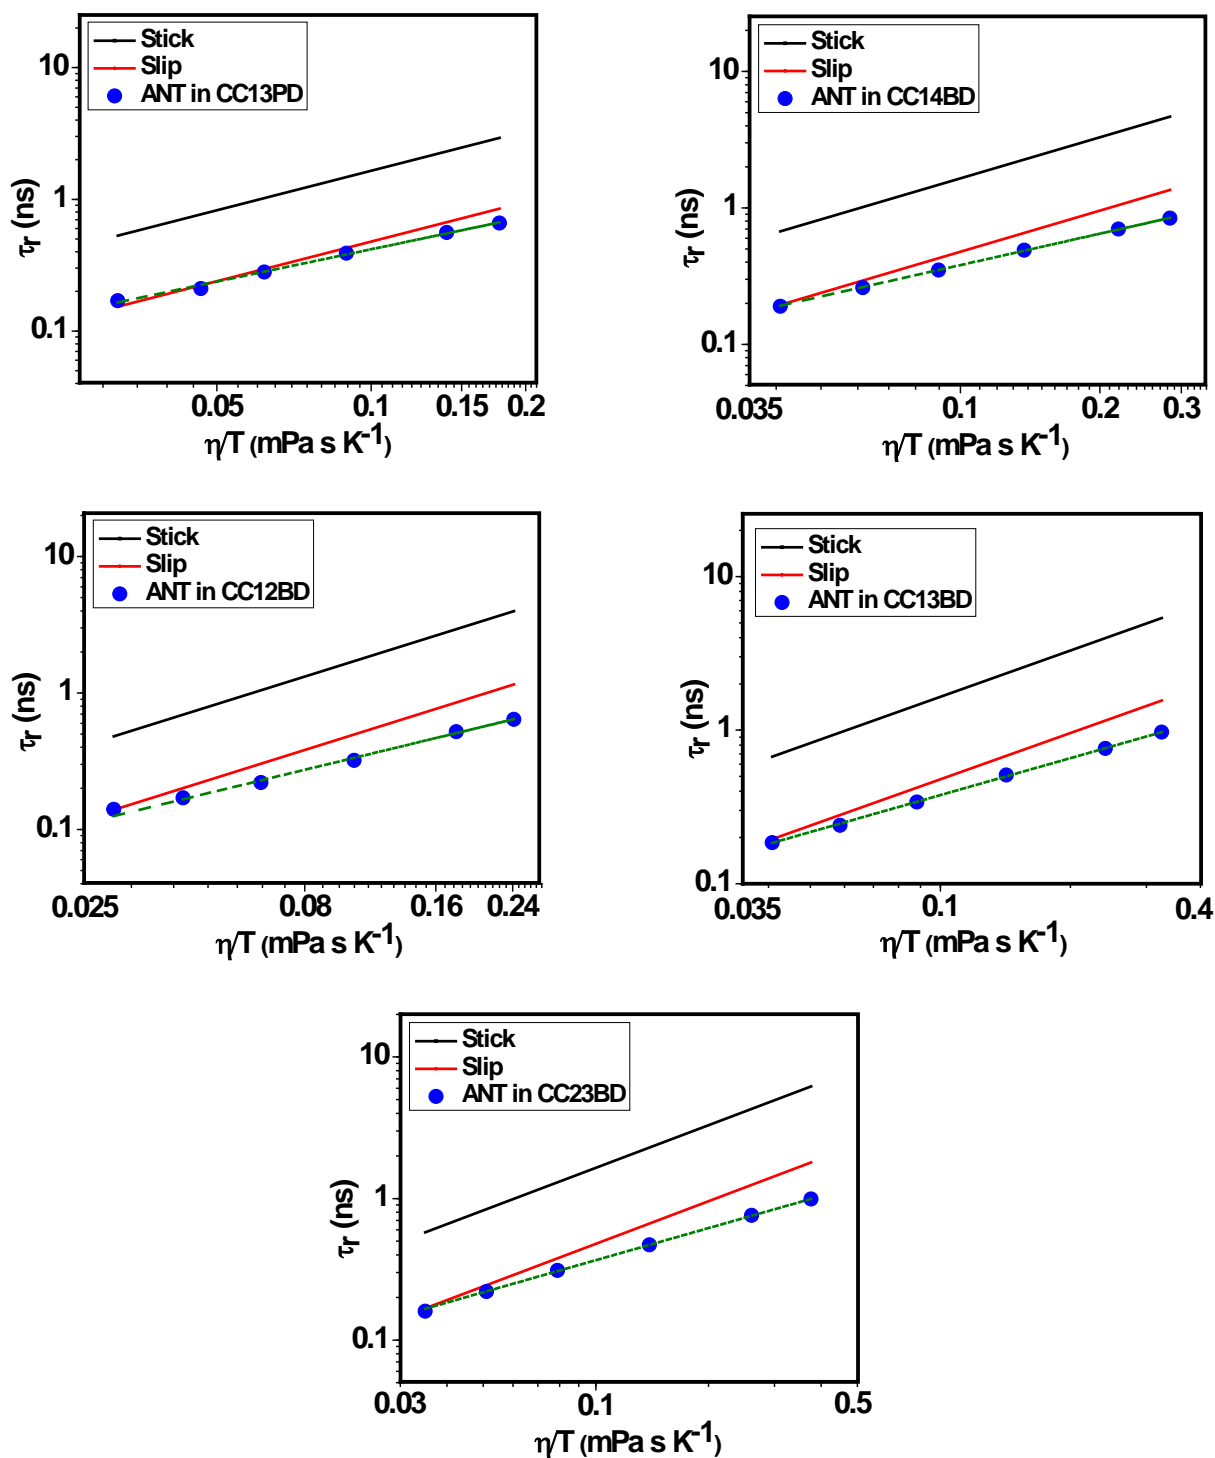

Figure S6. Plots of  $\tau_r$  vs  $\eta/T$  for ANT in DESs. The solid circles indicate the experimental rotational times and the dashed lines represent fit to the data according to  $\tau_r = A(\eta/T)^p$ . Computed stick (black) and slip (red) lines using SED theory are also shown.

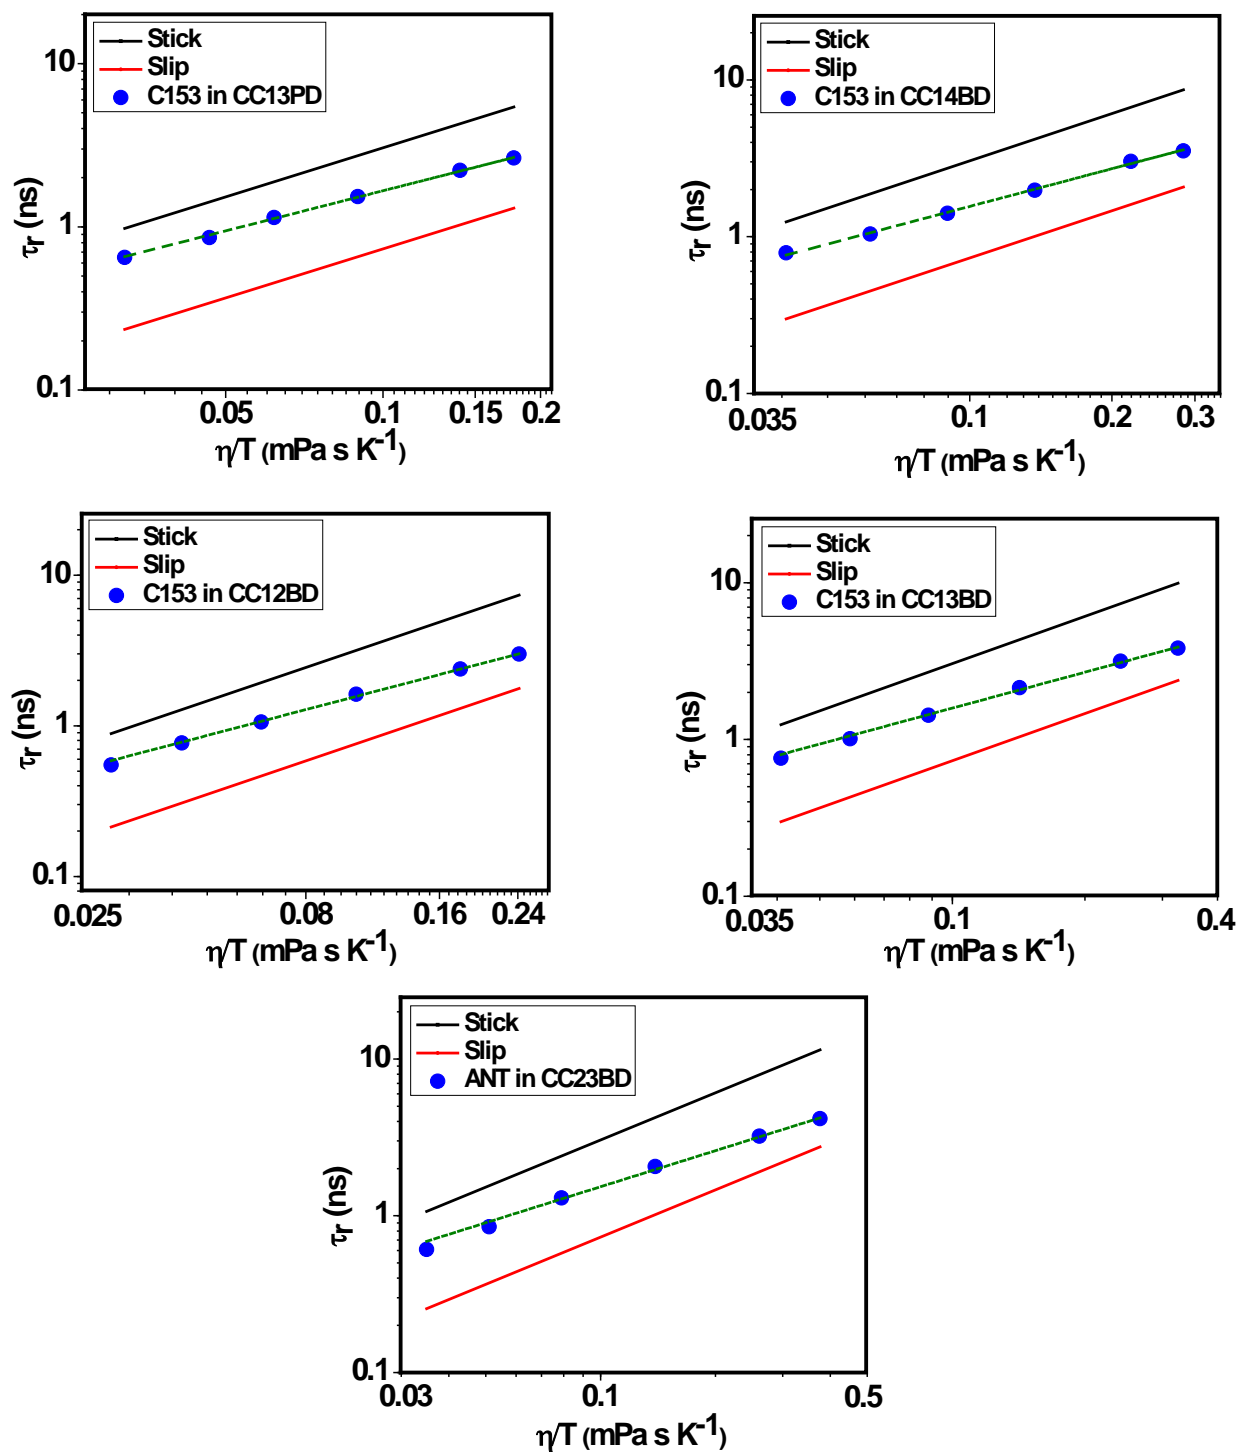

Figure S7. Plots of  $\tau_r$  vs  $\eta/T$  for C153 in DESs. The solid circles indicate the experimental rotational times and the dashed lines represent fit to the data according to  $\tau_r = A(\eta/T)^p$ . Computed stick (black) and slip (red) lines using SED theory are also shown.



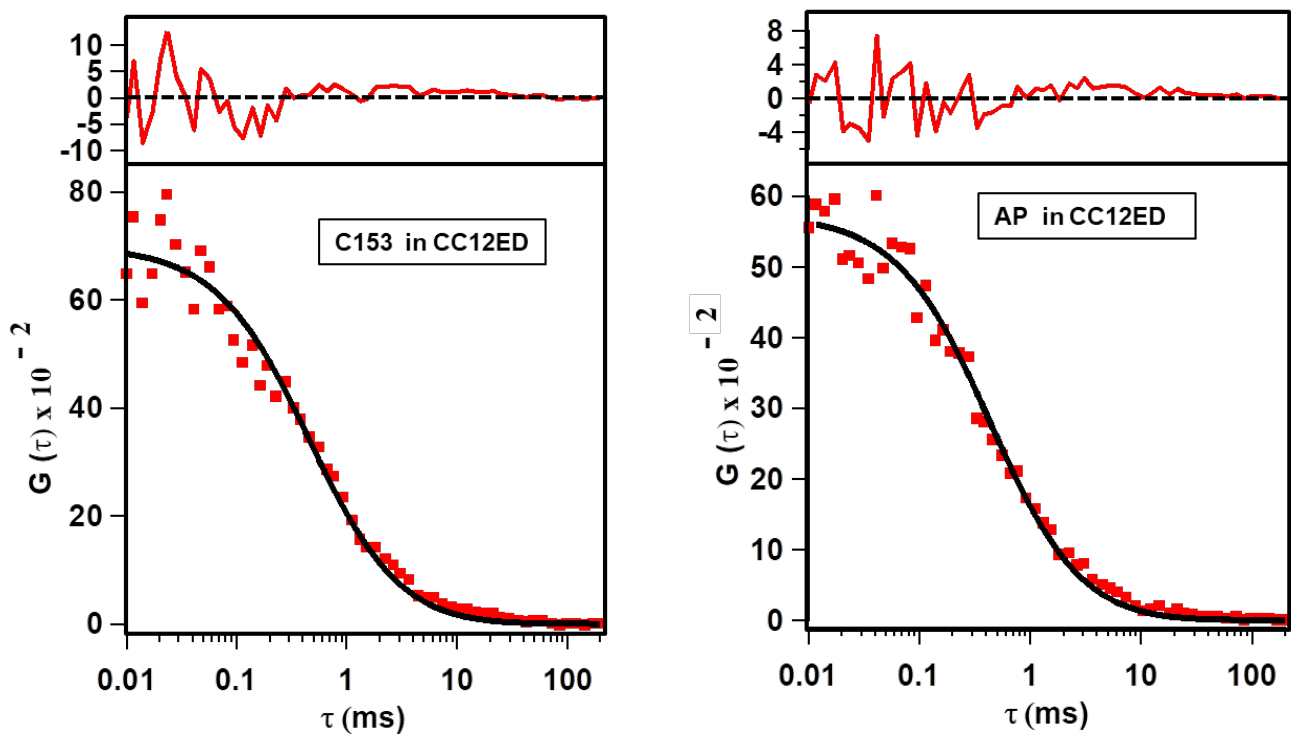

**Figure S8. Fluorescence correlation curves of the solutes in CC12ED system. The points are the experimental data, and the solid lines represent fit to the data using a single-component diffusion model. The residuals depicting quality of the fits are also shown at the top of each curve.**

**Table S1. Estimated Rotational Reorientation Times ( $\tau_r$ ) of the Solutes in DESs at Different Temperatures.**

| DESs   | Temp. (K) | Viscosity (cP) | Rotational reorientation time (ns) |      |      |
|--------|-----------|----------------|------------------------------------|------|------|
|        |           |                | C153                               | AP   | ANT  |
| CC12ED | 298       | 30.0           | 1.58                               | 1.65 | 0.44 |
|        | 303       | 24.5           | 1.30                               | 1.37 | 0.36 |
|        | 313       | 17.5           | 0.93                               | 0.97 | 0.27 |
|        | 323       | 13.5           | 0.69                               | 0.71 | 0.19 |
|        | 333       | 10.0           | 0.53                               | 0.55 | 0.16 |
|        | 343       | 08.0           | 0.43                               | 0.44 | 0.13 |
| CC13PD | 298       | 53.0           | 2.64                               | 3.14 | 0.66 |
|        | 303       | 42.5           | 2.22                               | 2.53 | 0.56 |
|        | 313       | 28.0           | 1.53                               | 1.83 | 0.39 |
|        | 323       | 20.0           | 1.14                               | 1.29 | 0.28 |
|        | 333       | 15.5           | 0.86                               | 0.96 | 0.21 |
|        | 343       | 11.0           | 0.65                               | 0.75 | 0.17 |
| CC14BD | 298       | 84.5           | 3.53                               | 5.08 | 0.84 |
|        | 303       | 66.5           | 3.02                               | 4.00 | 0.70 |
|        | 313       | 43.0           | 1.98                               | 2.72 | 0.49 |
|        | 323       | 29.0           | 1.41                               | 1.87 | 0.35 |
|        | 333       | 20.5           | 1.04                               | 1.36 | 0.26 |
|        | 343       | 14.0           | 0.79                               | 1.00 | 0.19 |
| CC12BD | 298       | 72.0           | 2.99                               | 5.30 | 0.64 |
|        | 303       | 54.0           | 1.38                               | 4.10 | 0.52 |
|        | 313       | 32.5           | 1.62                               | 2.50 | 0.32 |
|        | 323       | 20.5           | 1.06                               | 1.74 | 0.22 |
|        | 333       | 14.0           | 0.77                               | 1.18 | 0.17 |
|        | 343       | 10.0           | 0.55                               | 0.86 | 0.14 |
| CC13BD | 298       | 97.0           | 3.83                               | 5.96 | 0.97 |
|        | 303       | 73.0           | 3.16                               | 4.75 | 0.76 |
|        | 313       | 44.5           | 2.14                               | 3.03 | 0.51 |
|        | 323       | 28.5           | 1.43                               | 2.02 | 0.34 |
|        | 333       | 19.5           | 1.01                               | 1.39 | 0.24 |
|        | 343       | 14.0           | 0.76                               | 1.05 | 0.18 |
| CC23BD | 298       | 112.0          | 4.17                               | 7.20 | 0.99 |
|        | 303       | 79.0           | 3.22                               | 5.54 | 0.76 |
|        | 313       | 43.5           | 2.06                               | 3.09 | 0.47 |
|        | 323       | 25.5           | 1.30                               | 2.00 | 0.31 |
|        | 333       | 17.0           | 0.85                               | 1.33 | 0.22 |
|        | 343       | 12.0           | 0.61                               | 0.92 | 0.16 |
